# Supplementary material
Source: MDPI journal article supplement (https://www.mdpi.com/2306-5338/10/8/174)

# A First Step towards Developing a Decision Support System Based on the Integration of Environmental Monitoring Activities for Regional Water Resource Protection

Carmine Massarelli \*, Maria Silvia Binetti, Mariangela Triozzi and Vito Felice Uricchio

National Research Council of Italy, Water Research Institute, V.le F. De Blasio 5, 70132 Bari, Italy;  
mariasilvia.binetti@ba.irs.cnr.it (M.S.B.); mariangela.triozzi@ba.irs.cnr.it (M.T.);  
vito.uricchio@ba.irs.cnr.it (V.F.U.)

\* Correspondence: carmine.massarelli@ba.irs.cnr.it

File S1: Examples of sites with uncontrolled waste abandonment

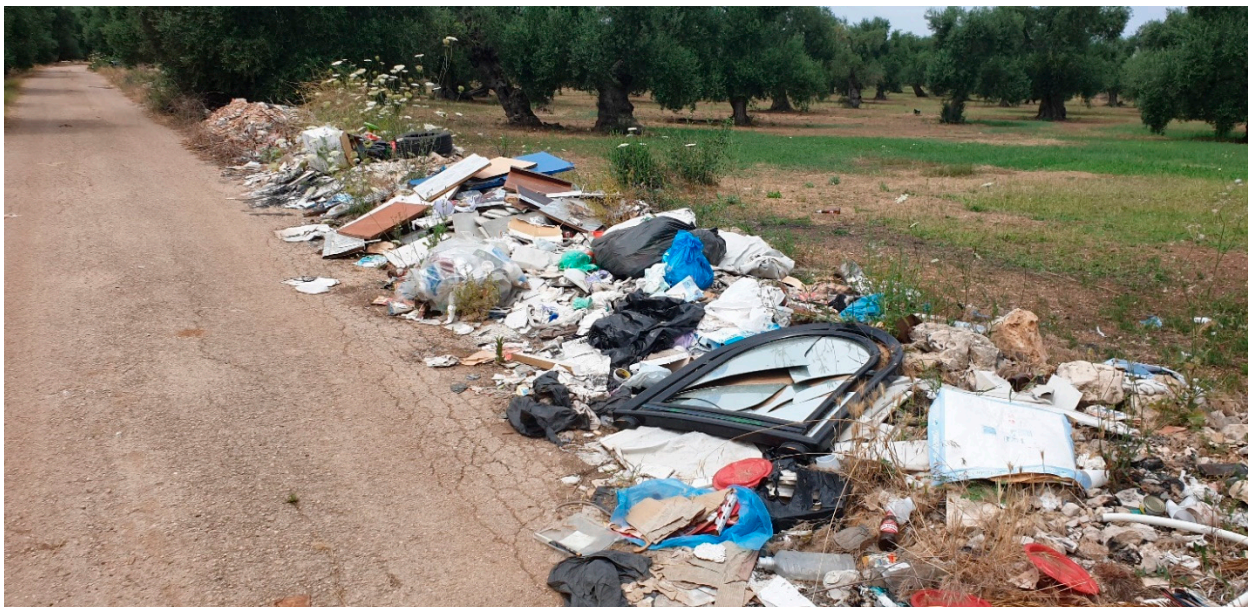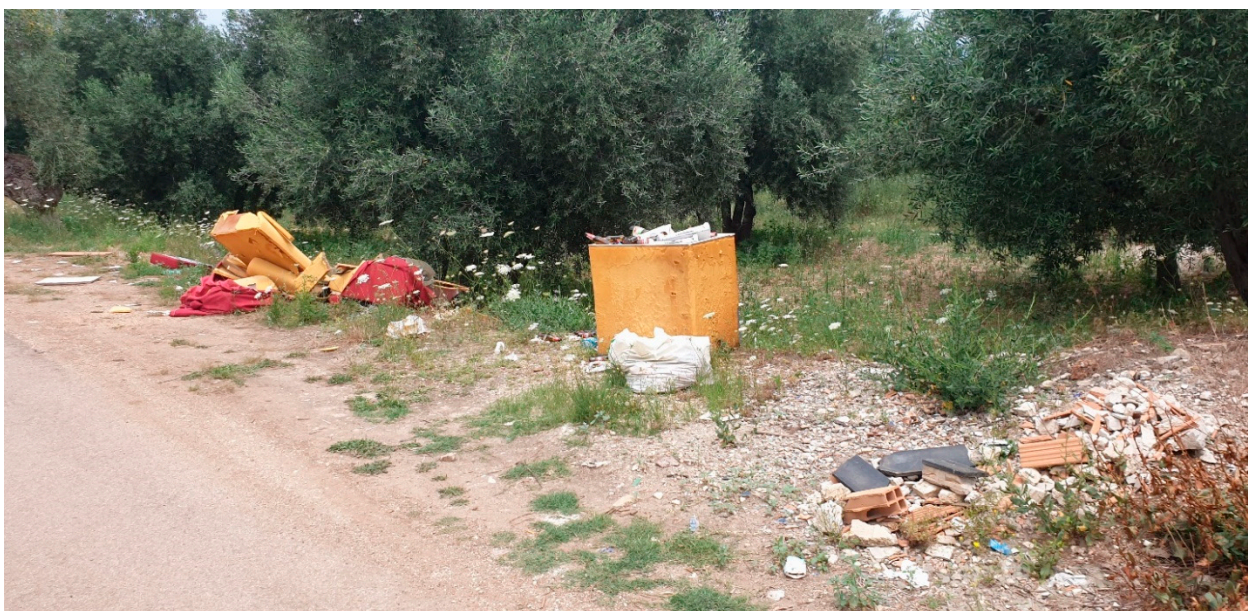



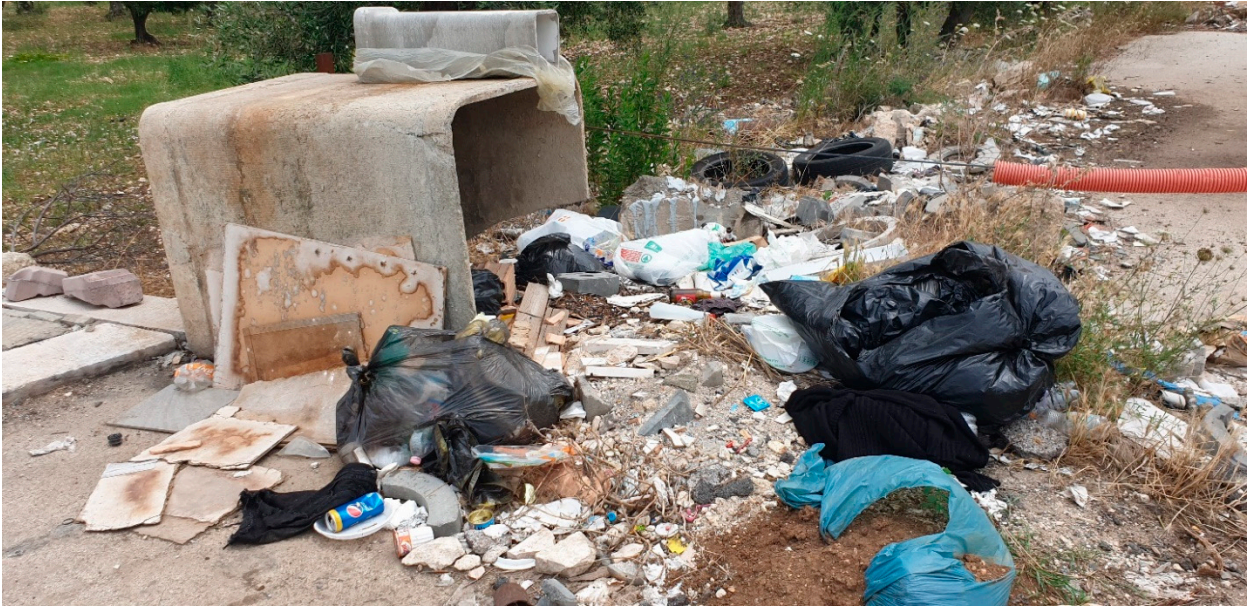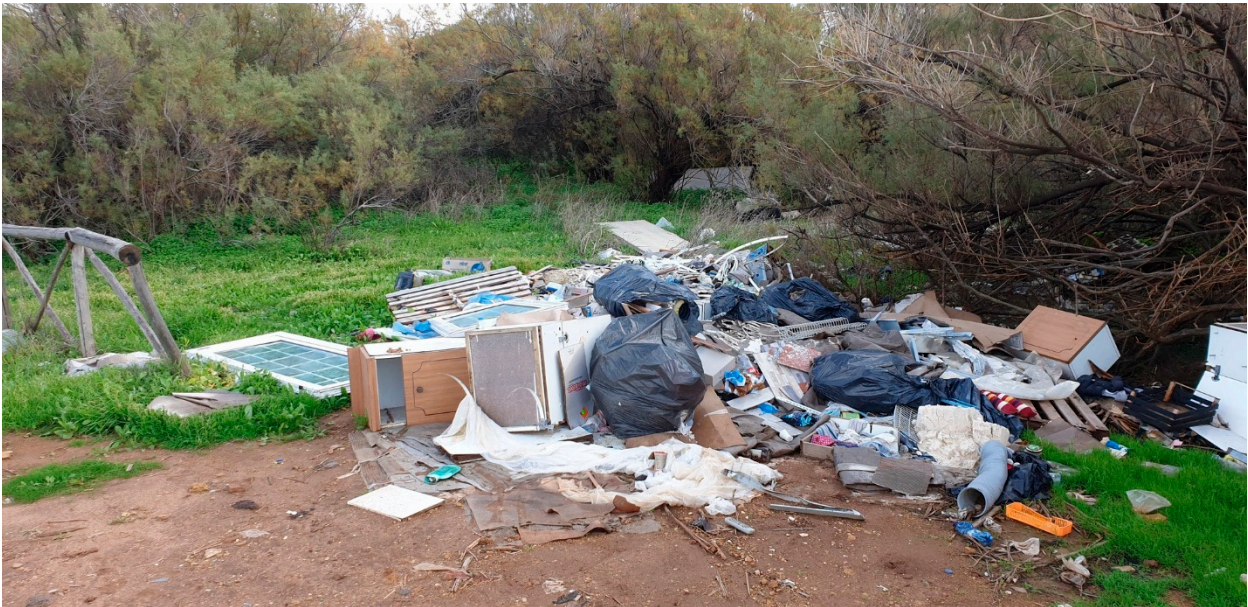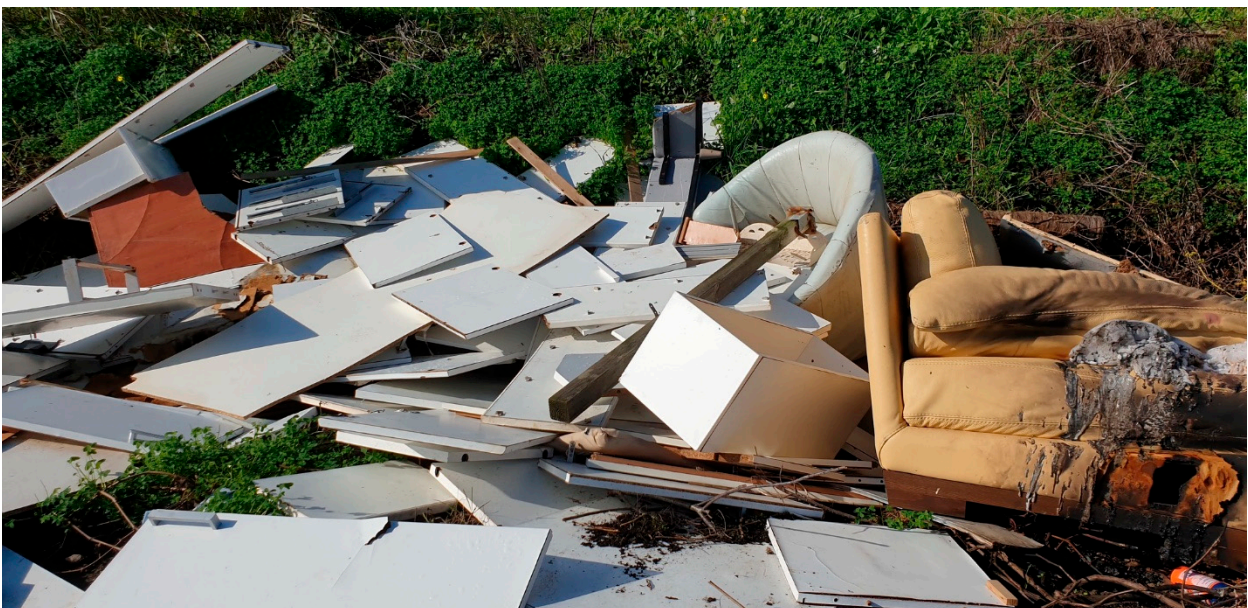



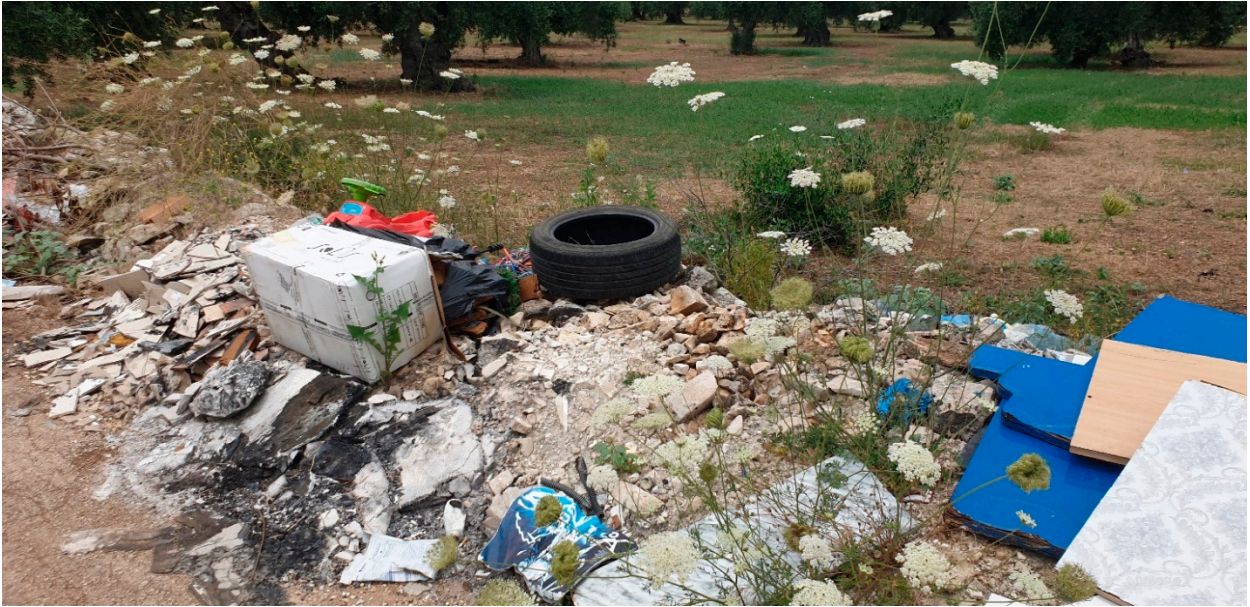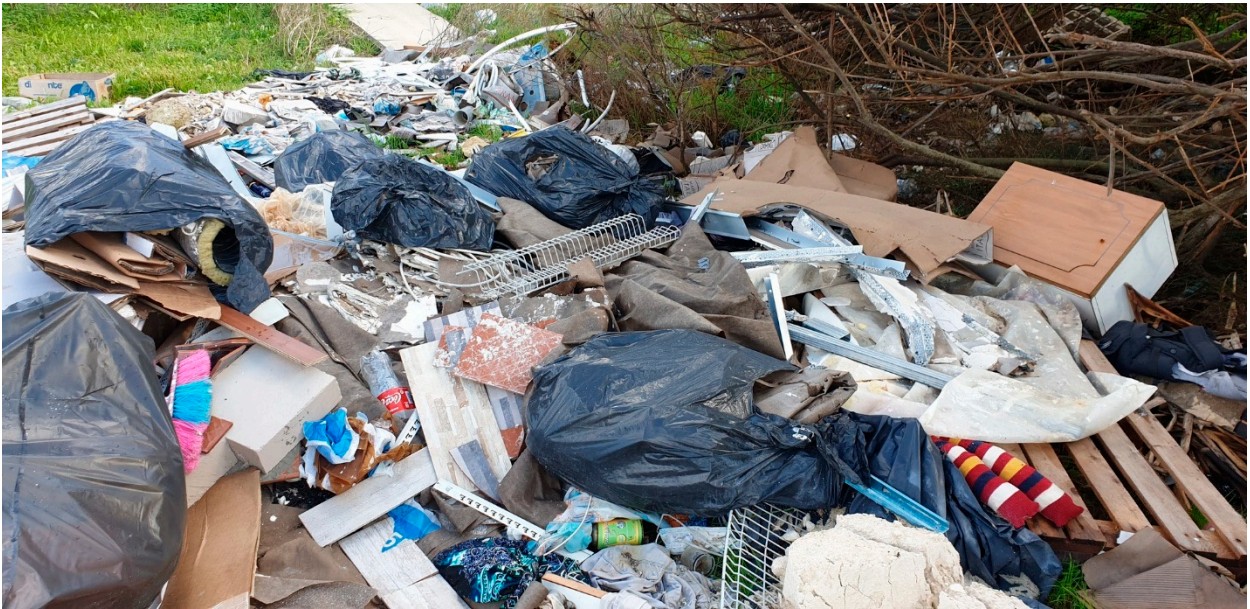



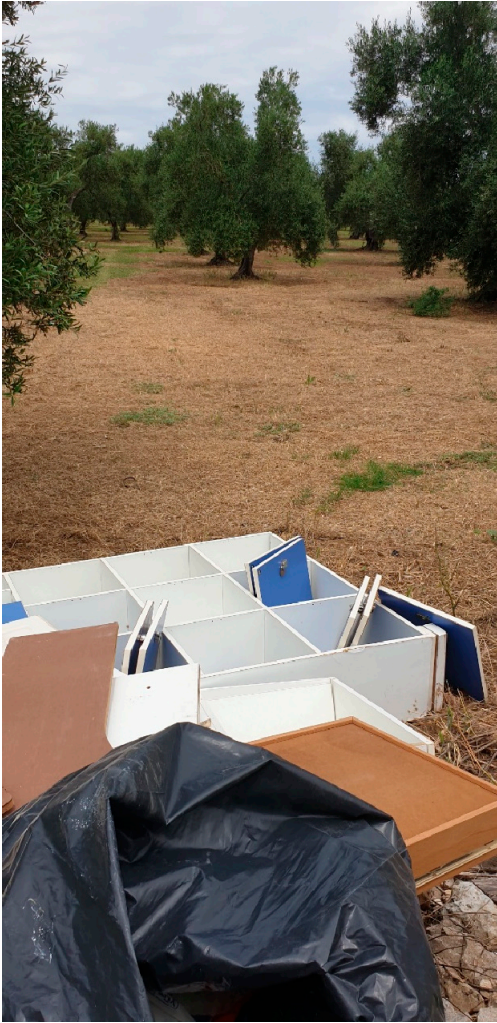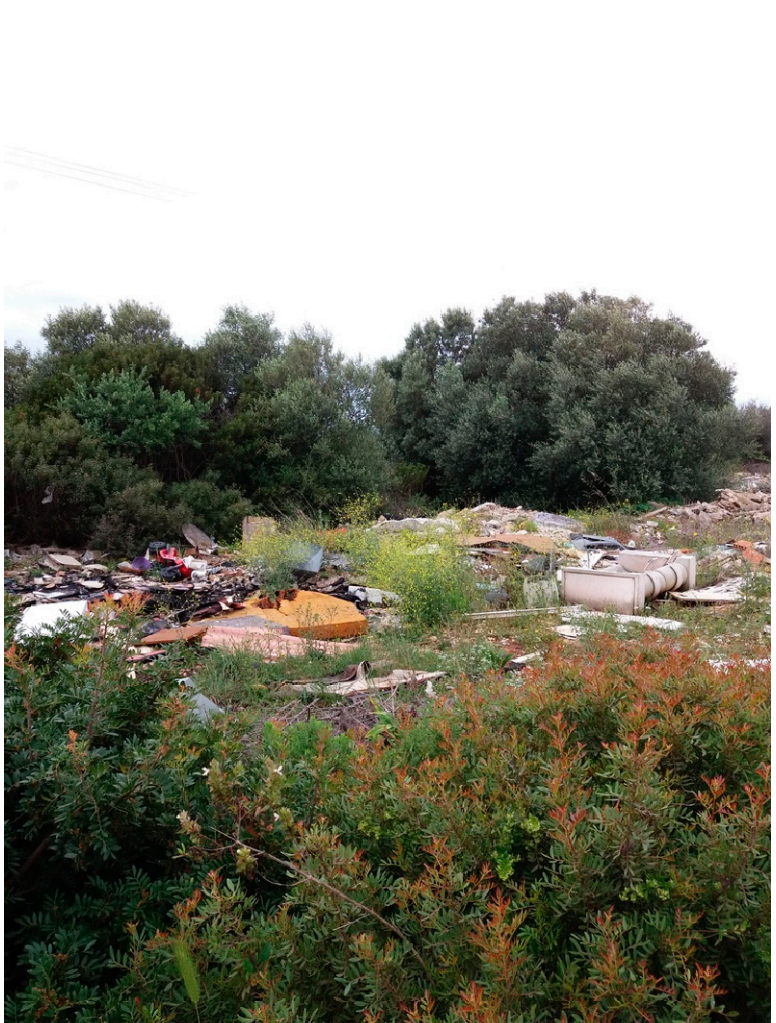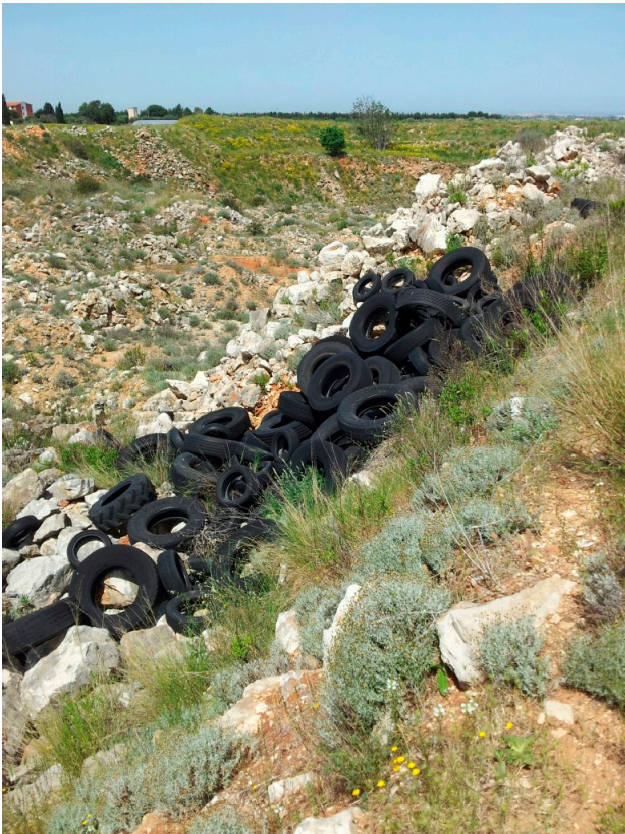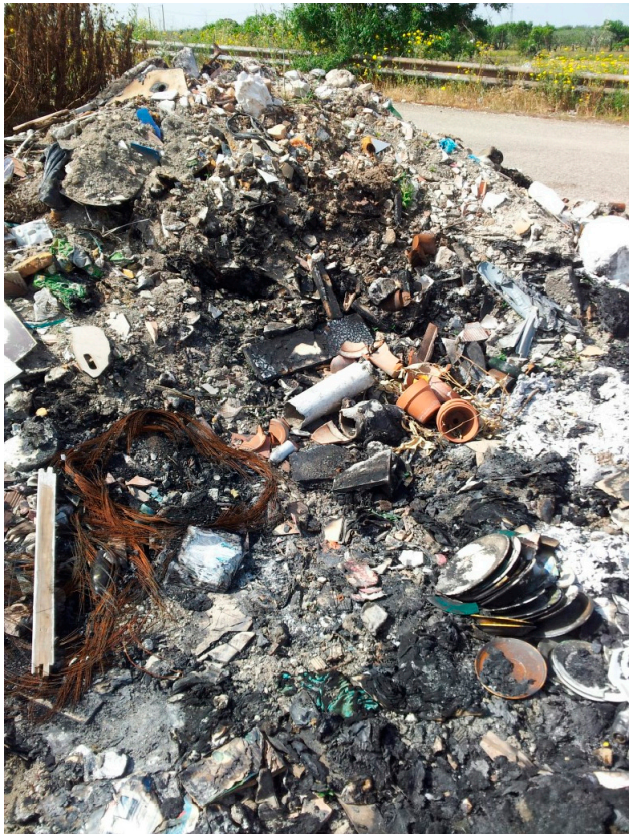



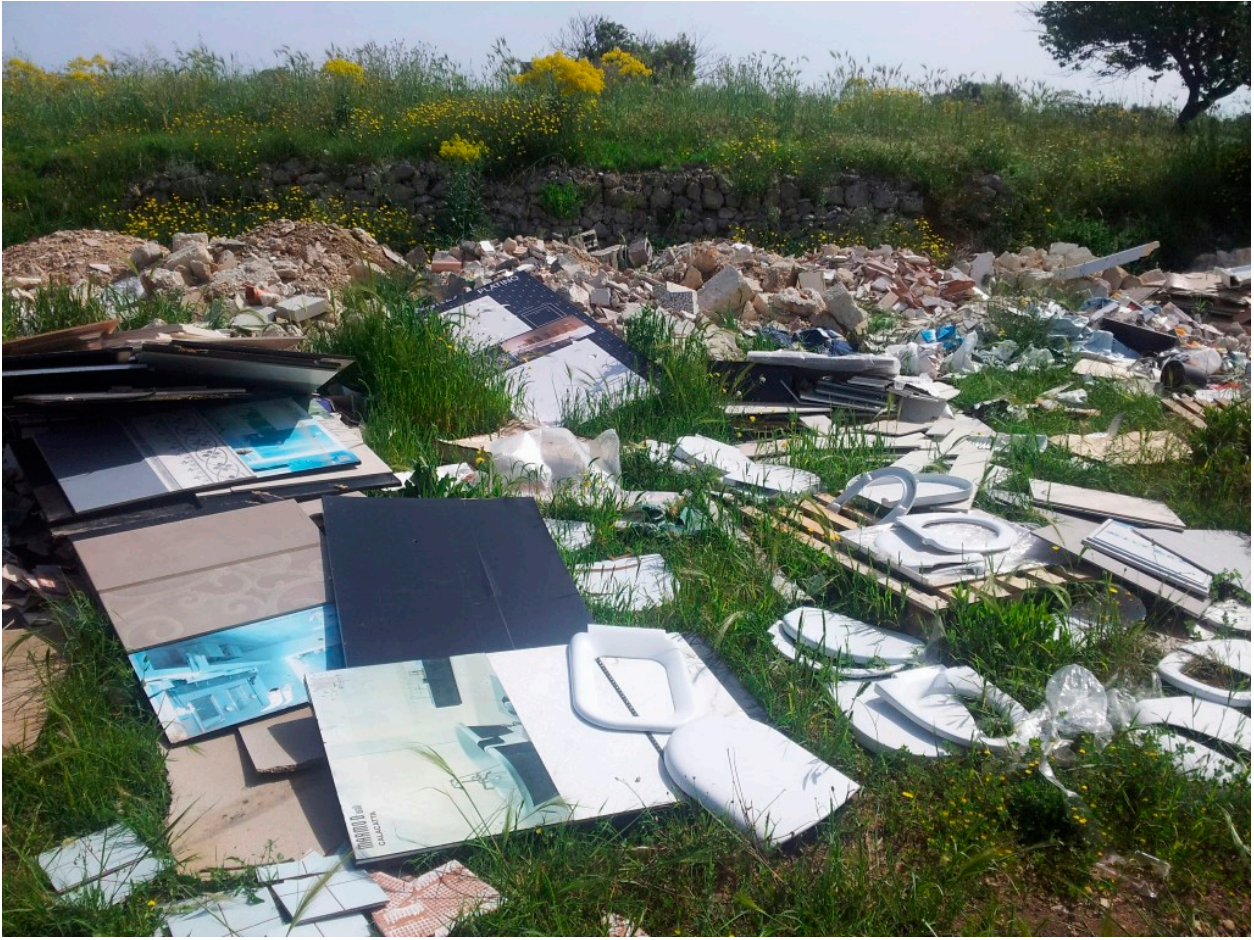

Supplement: s1 [file s1]
